# Supplementary material for: A novel series of pyrazole-platinum(II) complexes as potential anti-cancer agents that induce cell cycle arrest and apoptosis in breast cancer cells
Source: PubMed Central journal article supplement (PMC6009892; doi:10.1080/14756366.2018.1471687), 2018-06-04
Supplement: IENZ_A_1471687_SM4369.pdf [file IENZ_A_1471687_SM4369.pdf]

Table S1

|                                  | cisPt       | PtPz1              | PtPz2              | PtPz3              | PtPz4              | PtPz5              | PtPz6              |
|----------------------------------|-------------|--------------------|--------------------|--------------------|--------------------|--------------------|--------------------|
| MCF-7<br>(24 h incubation)       | >50 $\mu$ M | 17 $\pm$ 2 $\mu$ M | 20 $\pm$ 2 $\mu$ M | 23 $\pm$ 1 $\mu$ M | 32 $\pm$ 2 $\mu$ M | 28 $\pm$ 2 $\mu$ M | >50 $\mu$ M        |
| MCF-7<br>(48 h incubation)       | >50 $\mu$ M | 11 $\pm$ 1 $\mu$ M | 13 $\pm$ 1 $\mu$ M | 18 $\pm$ 2 $\mu$ M | 29 $\pm$ 2 $\mu$ M | 22 $\pm$ 2 $\mu$ M | 48 $\pm$ 2 $\mu$ M |
| MDA-MB-231<br>(24 h incubation)  | >50 $\mu$ M | 16 $\pm$ 1 $\mu$ M | 17 $\pm$ 2 $\mu$ M | 20 $\pm$ 2 $\mu$ M | 33 $\pm$ 3 $\mu$ M | 29 $\pm$ 1 $\mu$ M | >50 $\mu$ M        |
| MDA-MB-231<br>(48 h incubation)  | >50 $\mu$ M | 10 $\pm$ 1 $\mu$ M | 11 $\pm$ 1 $\mu$ M | 16 $\pm$ 1 $\mu$ M | 29 $\pm$ 2 $\mu$ M | 19 $\pm$ 2 $\mu$ M | 39 $\pm$ 2 $\mu$ M |
| Fibroblasts<br>(24 h incubation) | >50 $\mu$ M | 24 $\pm$ 3 $\mu$ M | 27 $\pm$ 2 $\mu$ M | 32 $\pm$ 1 $\mu$ M | >50 $\mu$ M        | 35 $\pm$ 1 $\mu$ M | >50 $\mu$ M        |
| Fibroblasts<br>(48 h incubation) | >50 $\mu$ M | 19 $\pm$ 2 $\mu$ M | 24 $\pm$ 2 $\mu$ M | 28 $\pm$ 2 $\mu$ M | 46 $\pm$ 2 $\mu$ M | 31 $\pm$ 2 $\mu$ M | >50 $\mu$ M        |

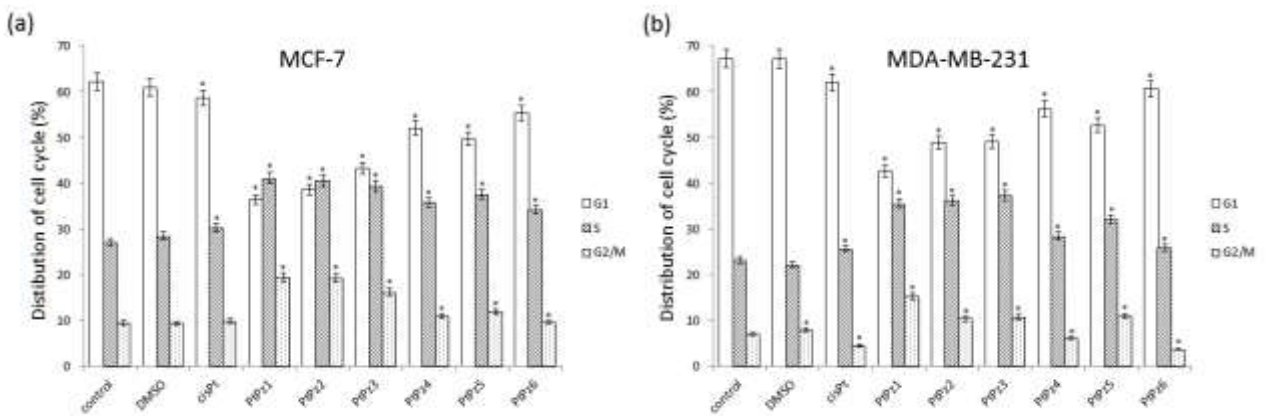

Figure S1

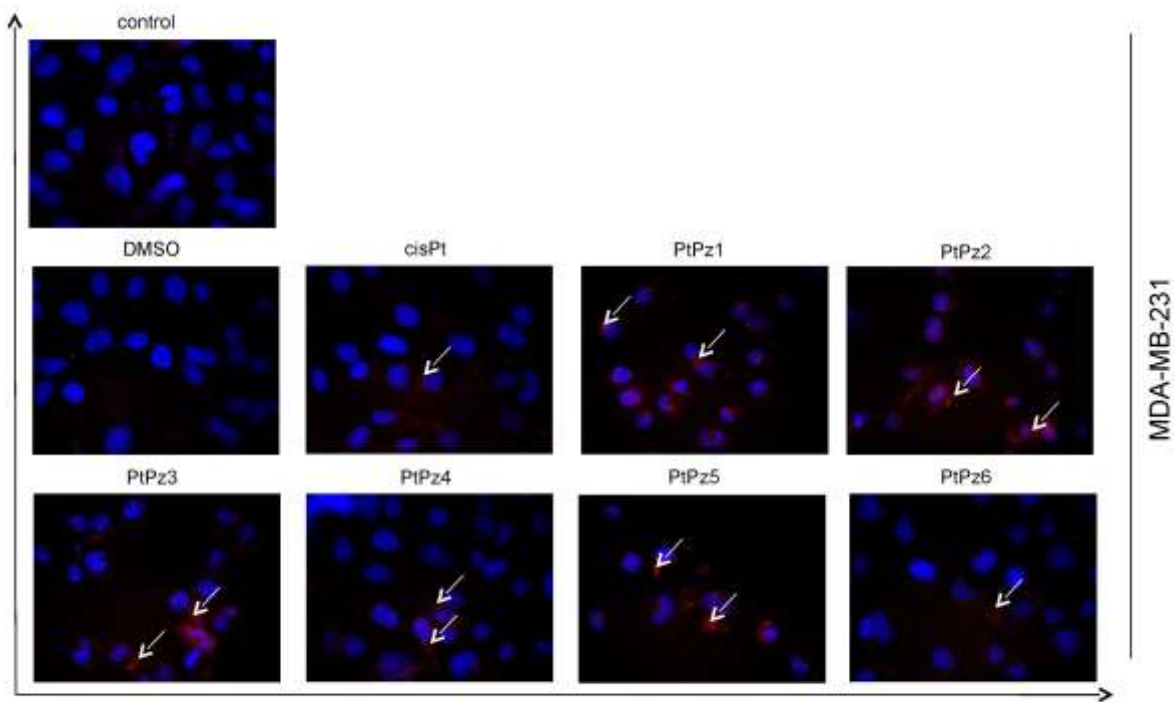

Figure S2

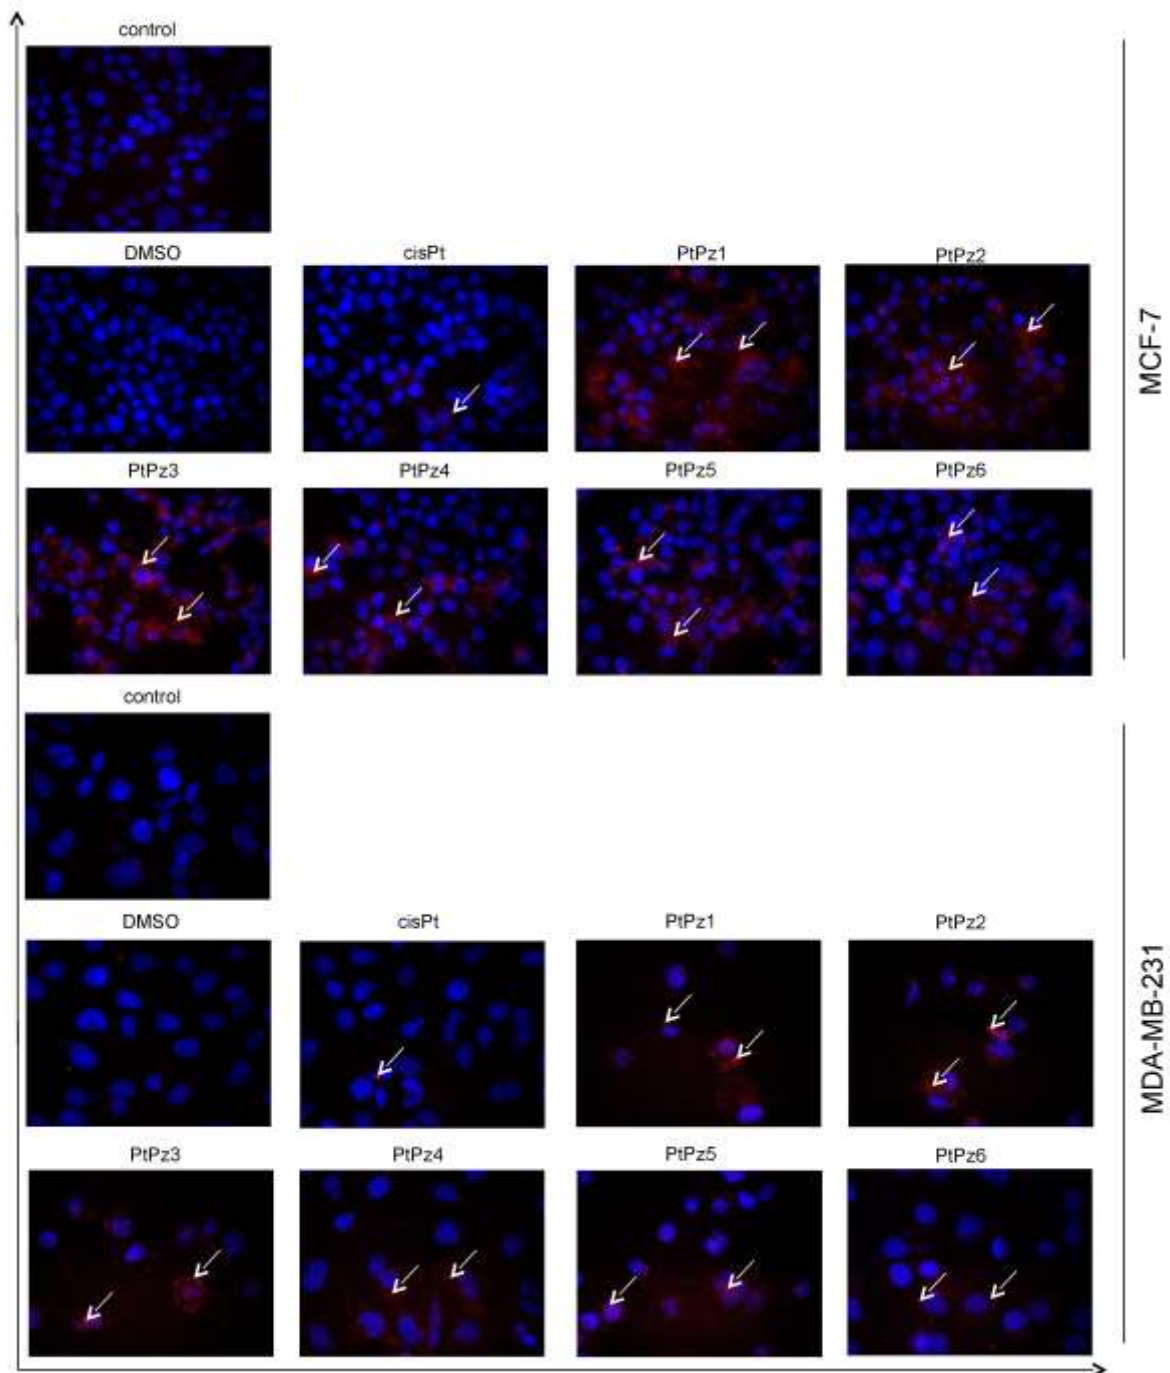

Figure S3

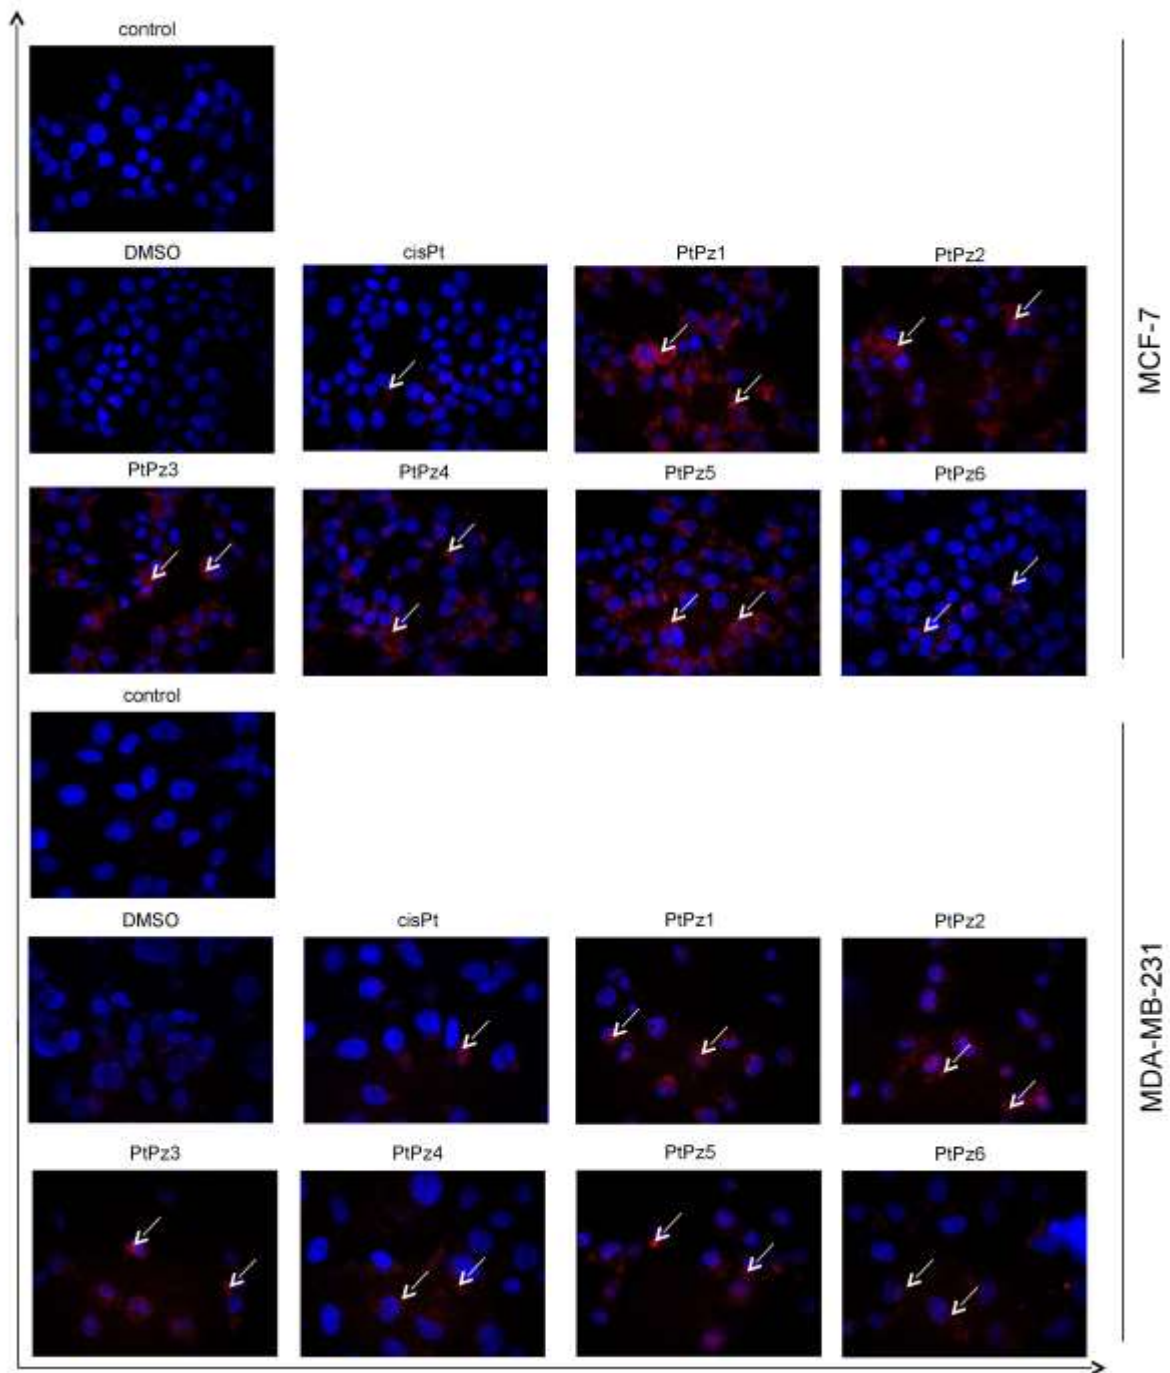

Figure S4
